# Supplementary material
Source: Springer Nature journal article supplement (https://www.springermedizin.de/resource/supplementary/12885_2008_1493_MOESM3_ESM.pdf/9472152)

### TOPFlash

| LEF-1            | + | +   | +     |
|------------------|---|-----|-------|
| $\beta$ -catenin | + | +   | +     |
| Repressor        | - | 250 | 500ng |

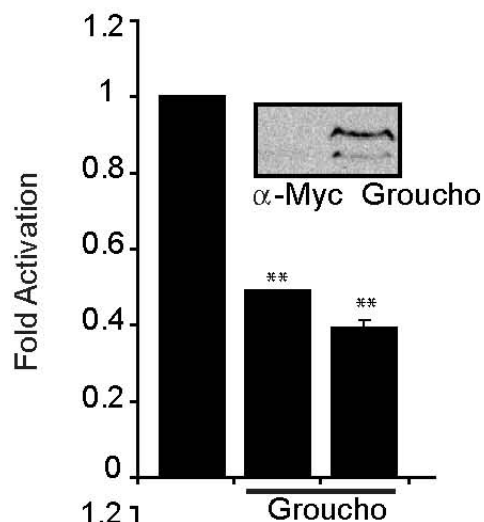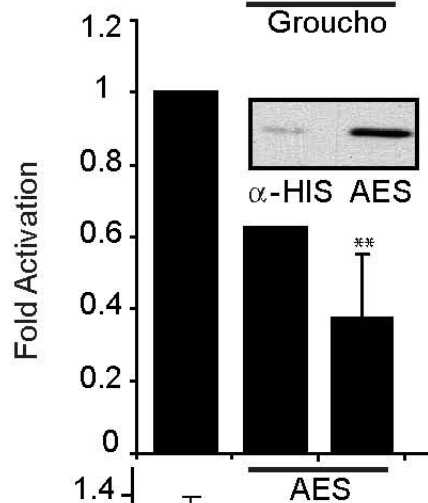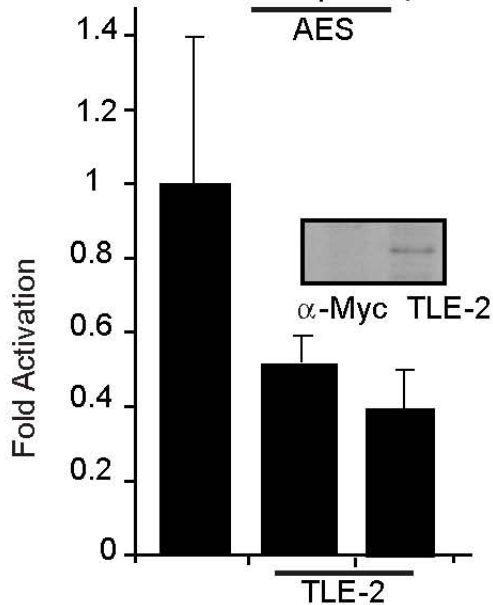

### FOPFlash

| LEF-1            | + | +   | +     |
|------------------|---|-----|-------|
| $\beta$ -catenin | + | +   | +     |
| Repressor        | - | 250 | 500ng |

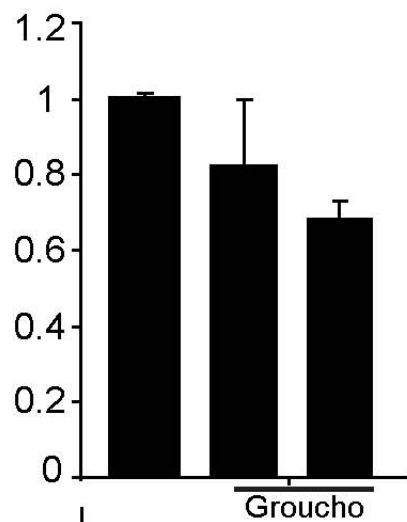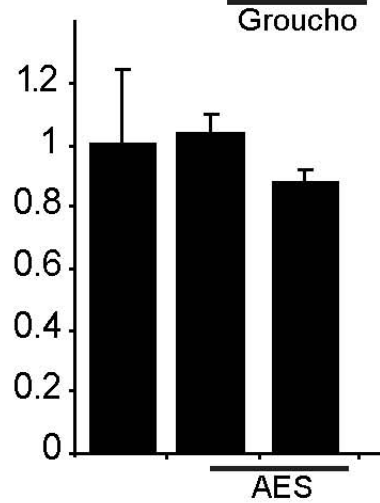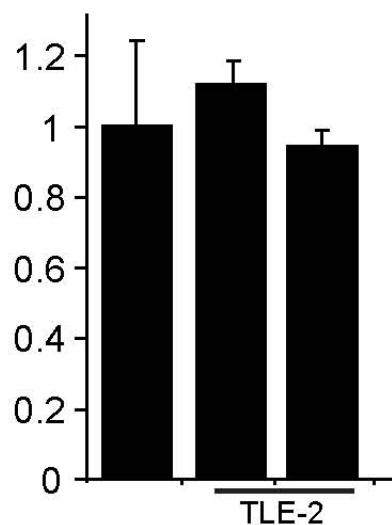

Supplement: MOESM3 [file 9472152]
